# Supplementary material for: Ultrafast propagation of β-amyloid fibrils in oligomeric cloud
Source: PubMed Central journal article supplement — Sci Rep. 2014 Nov 7;4:6960. doi: 10.1038/srep06960 (PMC4223663; doi:10.1038/srep06960), 2014-11-07
Supplement: srep06960-s8.pdf [file srep06960-s8.pdf]

## Supplementary Figures

### Ultrafast propagation of $\beta$ -amyloid fibrils in oligomeric cloud

Hirotsugu Ogi,<sup>1, a)</sup> Masahiko Fukukushima,<sup>1</sup> Hiroki Hamada,<sup>1</sup> Kentaro Noi,<sup>1</sup> Masahiko Hirao,<sup>1</sup>  
Hisashi Yagi,<sup>2, 3</sup> and Yuji Goto<sup>2</sup>

<sup>1)</sup>Graduate School of Engineering Science, Osaka University, Toyonaka,  
Osaka 560-8531, Japan

<sup>2)</sup>Institute for Protein Research, Osaka University, Yamadaoka 3-2, Suita, Osaka 565-0871, Japan

<sup>3)</sup>Current address: Center for Reserch on Green Sustainable Chemistry, Tottori University, 4-101  
Koyamatyo-minami, Tottori, Tottori 680-8550, Japan

<sup>a)</sup> corresponding author: [ogi@me.es.osaka-u.ac.jp](mailto:ogi@me.es.osaka-u.ac.jp)

## Supplementary Figure 1 The TIRFM-QCM system

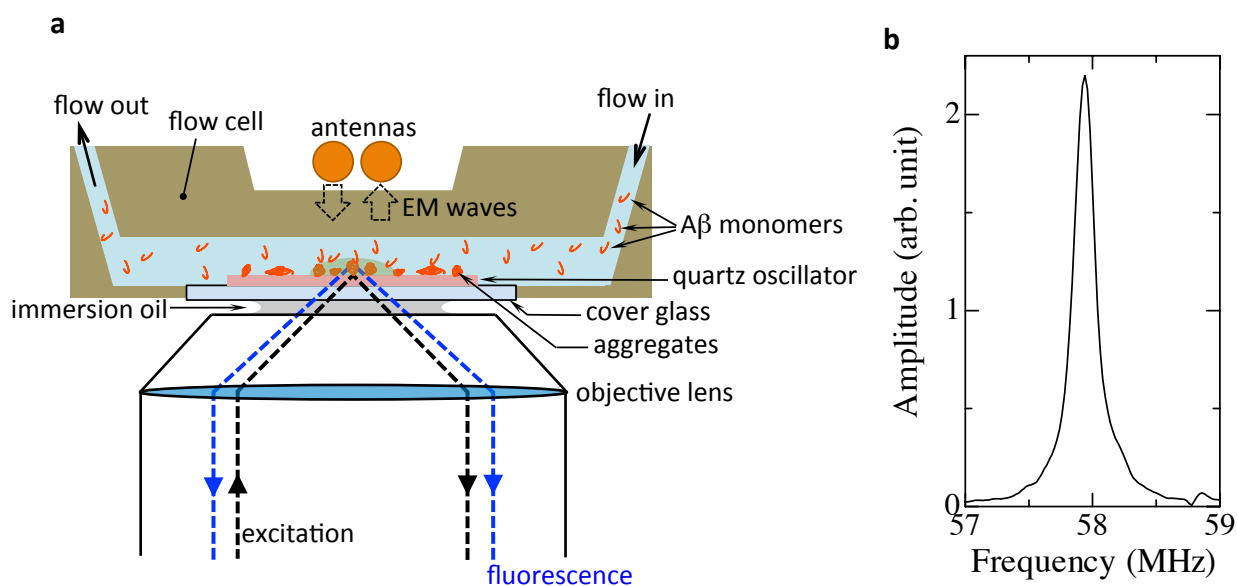

(a) Schematic of cross-section view of originally developed total-internal-reflection-fluorescence-microscopy quartz-crystal-microbalance (TIRFM-QCM) system. An AT-cut quartz resonator ( $2.5 \times 1.7 \times 0.0285 \text{ mm}^3$ ) is attached on a cover glass (0.15 mm thick), on which A $\beta$  seeds were immobilized and the A $\beta_{1-40}$  monomer solutions were flowed. Two line antennas for generation and detection of the shear vibration of the resonator were located outside the microchannel. (b) A measured resonant spectrum during the solution flow.

Supplementary Figure 2 Analysis of amount of deposited fibrils on surface.

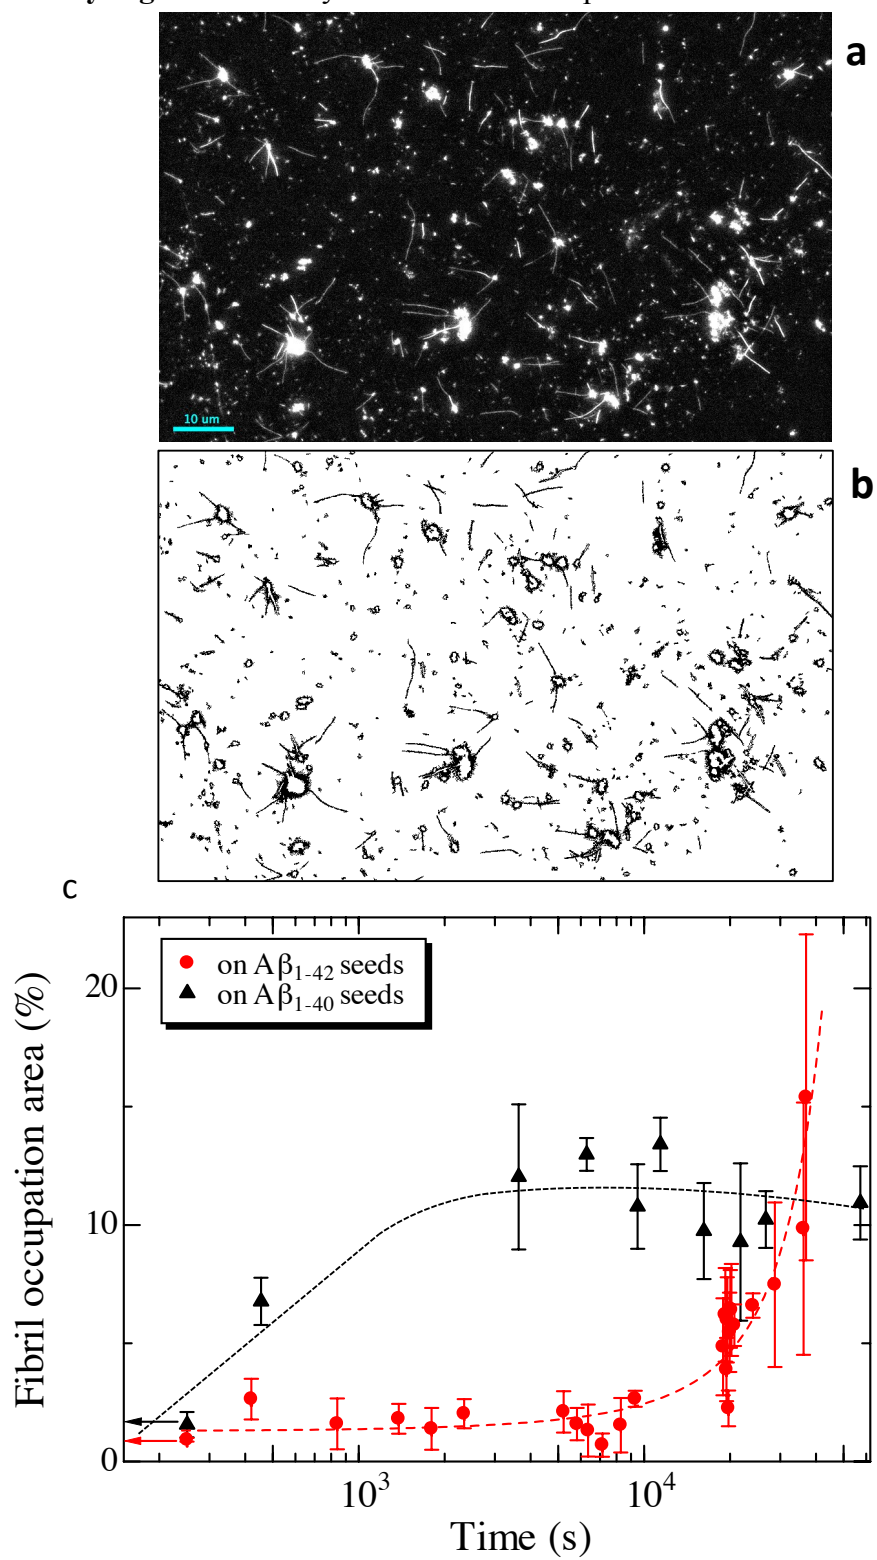

(a) A TIRFM image at 18900 s on the flow measurement of 10- $\mu$ M A $\beta_{1-40}$  solution on the A $\beta_{1-42}$  seeds and (b) its binarization using the software Image J. Smaller particles than 100 nm<sup>2</sup> were removed in the analysis. (c) Evolution of amount of fibrils on the surface obtained by the analysis of TIRFM images during the deposition reaction of 10- $\mu$ M A $\beta_{1-40}$  monomers on A $\beta_{1-42}$  and A $\beta_{1-40}$  seeds. Few fibrils appeared for the reaction on the A $\beta_{1-42}$  seeds, whereas fibril elongation was observed from the early stage on the A $\beta_{1-40}$  seeds (see Supplementary Fig. 4).

**Supplementary Figure 3** Fast formation of fibril network bridging nuclei.

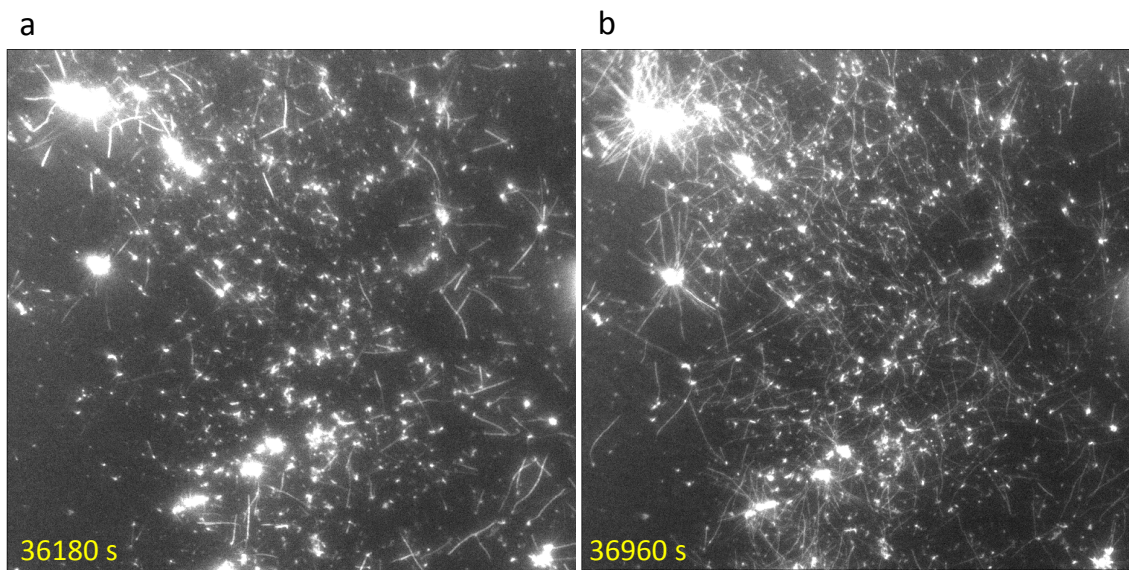

TIRFM images at (a) 36180 s and (b) 36960 s observed for the solution-flow measurement (10- $\mu$ M A $\beta_{1-40}$ ). Highly developed fibril network is established only for 13 min on nuclei, which are source and sinks of fibrils. The scale bar indicates 10  $\mu$ m.

**Supplementary Figure 4** Evolution of fibrils on  $A\beta_{1-40}$  seeds.

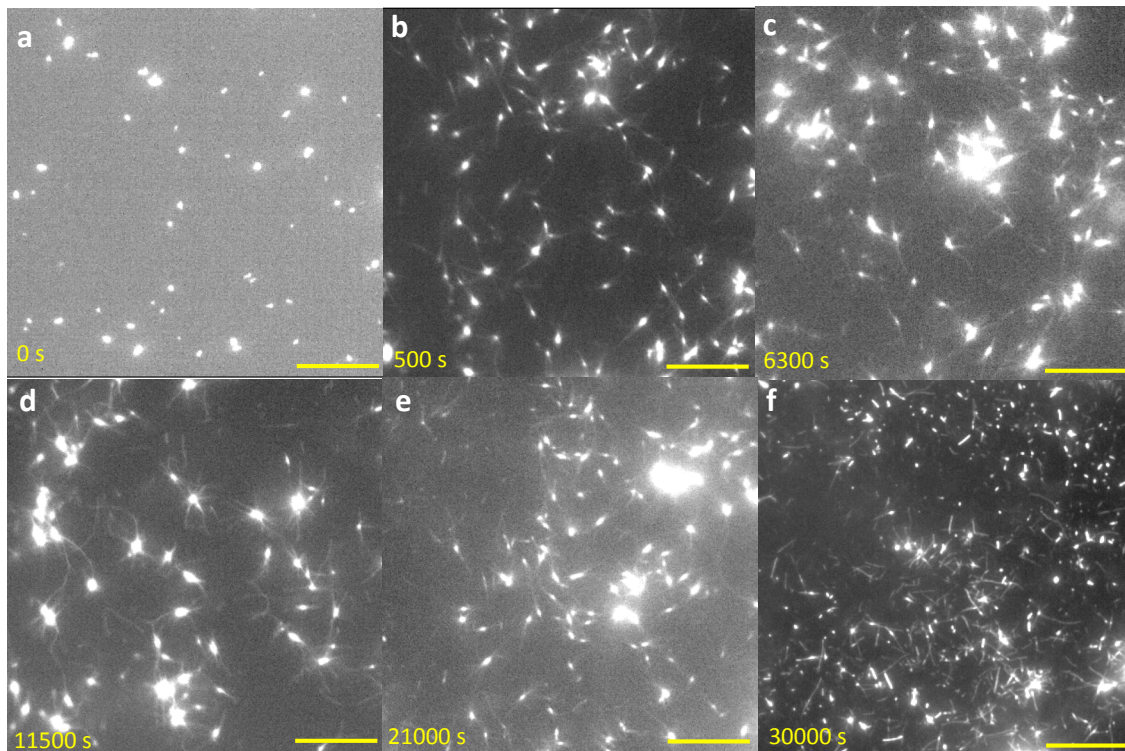

TIRFM images at (a) 0 s, (b) 500 s, (c) 6300 s, (d) 11500 s, (e) 21000 s, and (f) 30000 s for a solution-flow measurement with 10- $\mu$ M  $A\beta_{1-40}$  on  $A\beta_{1-40}$  seeds grown at pH4.8, corresponding to the data in Supplementary Fig. 2c. Fibrils appear soon after the deposition measurement, and the number of fibrils increases monotonically.

**Supplementary Figure 5** Behavior of  $A\beta_{1-40}$  fibril elongation on  $A\beta_{1-40}$  seeds at pH2.4 in a stagnant solution.

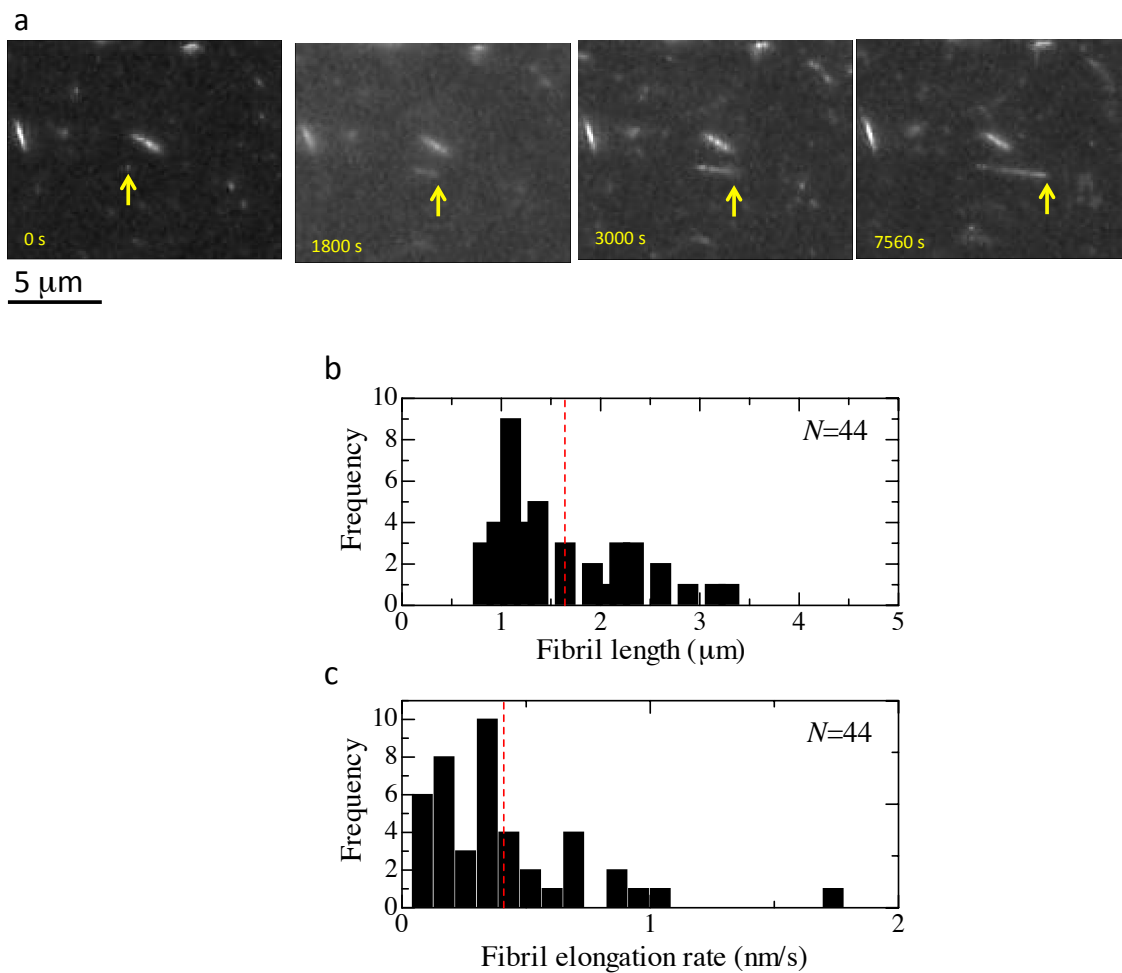

(a) Snapshots of the TIRFM images. (b) Histogram for fibril length and (c) that for the fibril elongation rate.

**Supplementary Figure 6** Newly created amyloid  $\beta$  fibrils.

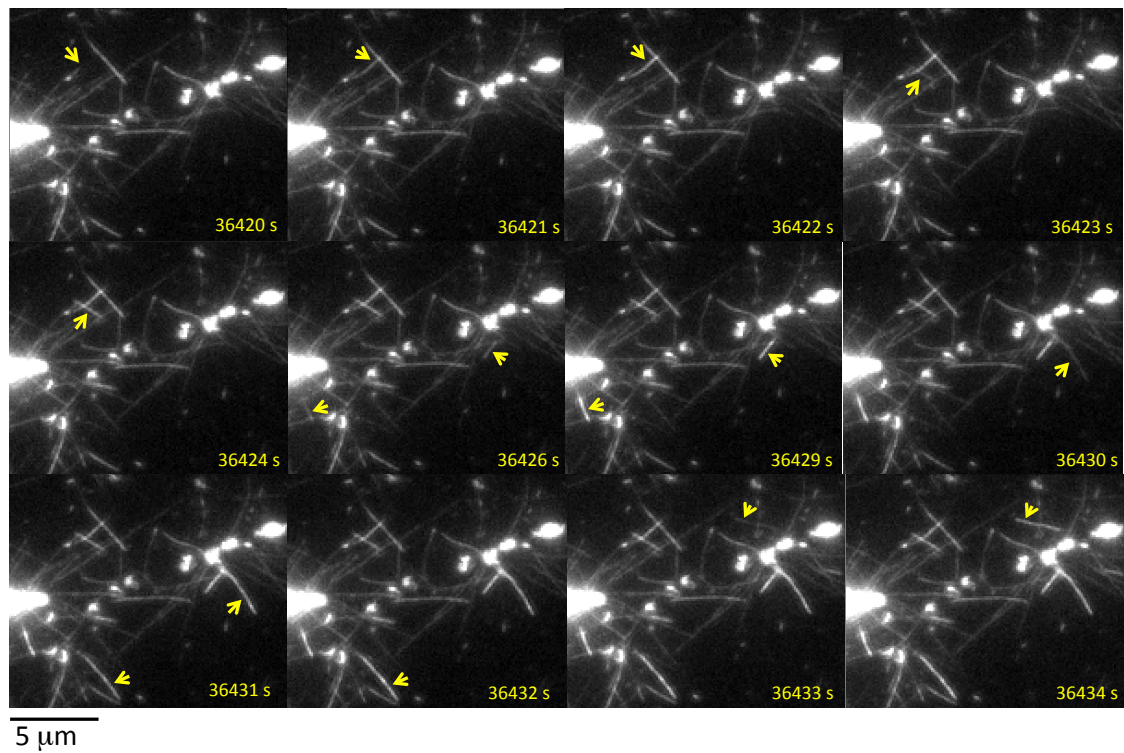

Many fibrils in the TIRFM images were recognized first with dark lines and then with bright lines, indicating observations of newly created fibrils. This dark-and-bright behavior is attributed to diffusion of thioflavin T to newly created fibrils.
